# Supplementary material
Source: publisher figshare collection journal article supplement (https://acs.figshare.com/ndownloader/files/4477519)
Supplement: Supplementary file 1 [file 4477519]

#  
#----------------------------------------------------------------------------#
#                   GLOBAL INFORMATION                                       #
#----------------------------------------------------------------------------#
data_global  

_audit_update_record
;
2009-11-11 # Formatted by publCIF
;
#------------------ SUBMISSION DETAILS --------------------------------------#
 
# Name and address of author for correspondence
 
_publ_contact_author_name      'Deng, Xiaohu'
_publ_contact_author_address
;
TransForm Pharmaceuticals
29 Hartwell Avenue
Lexington, MA 02421
USA
;
_publ_contact_author_email       xdeng@its.jnj.com
_publ_contact_author_fax         '1 858 320-3354'
_publ_contact_author_phone       '1 858 320-3338'

_publ_requested_journal   'insert journal here'
_publ_section_abstract 
;
insert abstract here
;
_publ_section_comment 
;
insert comment here
;
#------------------ TITLE AND AUTHOR LIST --------------------------------#
_publ_section_title
;
Title (type here to add)
;
_publ_section_title_footnote
.
loop_
_publ_author_name
_publ_author_address
'Cheung, E.'
;
TransForm Pharmaceuticals
29 Hartwell Avenue
Lexington, MA 02421
USA
;
_publ_section_references
;
Sheldrick, G. M. (1997). <i>SHELXL97</i>. Program for crystal structure
refinement. University of G\"ottingen, Germany.

Wilson, A. J. C. (1992). International Tables for Crystallography, Volume C,
Kluwer Academic Publishers, Dordrecht, The Netherlands.
; 
data_p21_g 
 
_audit_creation_method            SHELXL-97 

loop_ 
 _atom_type_symbol 
 _atom_type_description 
 _atom_type_scat_dispersion_real 
 _atom_type_scat_dispersion_imag 
 _atom_type_scat_source 
 'C'  'C'   0.0033   0.0016 
 'International Tables Vol C Tables 4.2.6.8 and 6.1.1.4' 
 'H'  'H'   0.0000   0.0000 
 'International Tables Vol C Tables 4.2.6.8 and 6.1.1.4' 
 'N'  'N'   0.0061   0.0033 
 'International Tables Vol C Tables 4.2.6.8 and 6.1.1.4' 
 'O'  'O'   0.0106   0.0060 
 'International Tables Vol C Tables 4.2.6.8 and 6.1.1.4' 
 'Cl'  'Cl'   0.1484   0.1585 
 'International Tables Vol C Tables 4.2.6.8 and 6.1.1.4' 
 
_symmetry_cell_setting            monoclinic 
_symmetry_space_group_name_H-M    P2(1)
_symmetry_space_group_name_Hall   P2yb

loop_ 
 _symmetry_equiv_pos_as_xyz 
 'x, y, z' 
 '-x, y+1/2, -z' 

#----------------------------------------------------------------------------#
#                   CHEMICAL INFORMATION                                     #
#----------------------------------------------------------------------------#
_chemical_name_systematic 
; 
 ? 
; 
_chemical_name_common             ? 
_chemical_melting_point           ? 
_chemical_formula_moiety          'C42 H46 N6 O7 Cl2' 
_chemical_formula_sum 
 'C42 H46 Cl2 N6 O7' 
_chemical_formula_weight          817.75 
_chemical_absolute_configuration  syn

#----------------------------------------------------------------------------#
#                   UNIT CELL INFORMATION                                    #
#----------------------------------------------------------------------------#
_cell_length_a                    9.1456(3) 
_cell_length_b                    23.7838(8) 
_cell_length_c                    18.5154(6) 
_cell_angle_alpha                 90.00 
_cell_angle_beta                  97.523(2) 
_cell_angle_gamma                 90.00 
_cell_volume                      3992.7(2) 
_cell_formula_units_Z             4 
_cell_measurement_temperature     100(2) 
_cell_measurement_reflns_used     8759 
_cell_measurement_theta_min       2.405 
_cell_measurement_theta_max       23.653 
#----------------------------------------------------------------------------#
#                   CRYSTAL INFORMATION                                      #
#----------------------------------------------------------------------------#
_exptl_crystal_description        needle 
_exptl_crystal_colour             colourless
_exptl_crystal_size_max           0.33 
_exptl_crystal_size_mid           0.05 
_exptl_crystal_size_min           0.03 
_exptl_crystal_density_meas       ? 
_exptl_crystal_density_diffrn     1.360 
_exptl_crystal_density_method     'not measured' 
_exptl_crystal_F_000              1720 
#----------------------------------------------------------------------------#
#                   ABSORPTION CORRECTION                                    #
#----------------------------------------------------------------------------#
_exptl_absorpt_coefficient_mu     0.222 
_exptl_absorpt_correction_type    none 
_exptl_absorpt_correction_T_min   0.9304 
_exptl_absorpt_correction_T_max   0.9934 
_exptl_absorpt_process_details    ? 

#----------------------------------------------------------------------------#
#                   DATA COLLECTION                                          #
#----------------------------------------------------------------------------#


_diffrn_measurement_device_type    'kappa APEX II CCD'
_diffrn_measurement_method          'phi and omega scans'
_diffrn_standards_number          0  
_exptl_special_details 
; 
 ? 
; 
_diffrn_ambient_temperature       100(2) 
_diffrn_radiation_wavelength      0.71073 
_diffrn_radiation_type            MoK\a 
_diffrn_radiation_source          'fine-focus sealed tube' 
_diffrn_radiation_monochromator   graphite 
_diffrn_reflns_number             21785 
_diffrn_reflns_av_R_equivalents   0.0399 
_diffrn_reflns_av_sigmaI/netI     0.0658 
_diffrn_reflns_limit_h_min        -10 
_diffrn_reflns_limit_h_max        10 
_diffrn_reflns_limit_k_min        -26 
_diffrn_reflns_limit_k_max        23 
_diffrn_reflns_limit_l_min        -20 
_diffrn_reflns_limit_l_max        20 
_diffrn_reflns_theta_min          2.04 
_diffrn_reflns_theta_max          23.71 
_reflns_number_total              11655 
_reflns_number_gt                 7934 
_reflns_threshold_expression      >2sigma(I) 

#----------------------------------------------------------------------------#
#                   COMPUTER PROGRAMS USED                                   #
#----------------------------------------------------------------------------#
_computing_data_collection        ? 
_computing_cell_refinement        ? 
_computing_data_reduction         ? 
_computing_structure_solution     'SHELXS-97 (Sheldrick, 1990)' 
_computing_structure_refinement   'SHELXL-97 (Sheldrick, 1997)' 
_computing_molecular_graphics     ? 
_computing_publication_material   ? 

#----------------------------------------------------------------------------#
#                   REFINEMENT INFORMATION                                   #
#----------------------------------------------------------------------------#

_refine_special_details 
; 
 Refinement of F^2^ against ALL reflections.  The weighted R-factor wR and 
 goodness of fit S are based on F^2^, conventional R-factors R are based 
 on F, with F set to zero for negative F^2^. The threshold expression of 
 F^2^ > 2sigma(F^2^) is used only for calculating R-factors(gt) etc. and is 
 not relevant to the choice of reflections for refinement.  R-factors based 
 on F^2^ are statistically about twice as large as those based on F, and R- 
 factors based on ALL data will be even larger. 
; 
 
_refine_ls_structure_factor_coef  Fsqd  
_refine_ls_matrix_type            full 
_refine_ls_weighting_scheme       calc  
_refine_ls_weighting_details 
 'calc w=1/[\s^2^(Fo^2^)+(0.0567P)^2^+0.3966P] where P=(Fo^2^+2Fc^2^)/3' 
_atom_sites_solution_primary      direct 
_atom_sites_solution_secondary    difmap 
_atom_sites_solution_hydrogens    geom 
_refine_ls_hydrogen_treatment     constr 
_refine_ls_extinction_method      none 
_refine_ls_extinction_coef        ? 
_refine_ls_abs_structure_details 
 'Flack H D (1983), Acta Cryst. A39, 876-881' 
_refine_ls_abs_structure_Flack    -0.08(12) 
_refine_ls_number_reflns          11655 
_refine_ls_number_parameters      1037 
_refine_ls_number_restraints      1 
_refine_ls_R_factor_all           0.0883 
_refine_ls_R_factor_gt            0.0495 
_refine_ls_wR_factor_ref          0.1189 
_refine_ls_wR_factor_gt           0.1027 
_refine_ls_goodness_of_fit_ref    1.009 
_refine_ls_restrained_S_all       1.009 
_refine_ls_shift/su_max           0.008 
_refine_ls_shift/su_mean          0.001 
 
loop_ 
 _atom_site_label 
 _atom_site_type_symbol 
 _atom_site_fract_x 
 _atom_site_fract_y 
 _atom_site_fract_z 
 _atom_site_U_iso_or_equiv 
 _atom_site_adp_type 
 _atom_site_occupancy 
 _atom_site_symmetry_multiplicity 
 _atom_site_calc_flag 
 _atom_site_refinement_flags 
 _atom_site_disorder_assembly 
 _atom_site_disorder_group 
Cl1 Cl 0.5736(3) -1.20329(9) -0.55865(13) 0.0416(6) Uani 1 1 d . . . 
Cl2 Cl 0.0061(3) -1.10017(11) -1.33788(13) 0.0490(6) Uani 1 1 d . . . 
C1 C -0.5438(10) -0.1364(4) -1.2555(5) 0.036(2) Uani 1 1 d . . . 
C2 C -0.5022(9) -0.0828(4) -1.2365(5) 0.038(3) Uani 1 1 d . . . 
H2 H -0.4482 -0.0613 -1.2672 0.046 Uiso 1 1 calc R . . 
C3 C -0.5387(9) -0.0590(4) -1.1715(5) 0.040(2) Uani 1 1 d . . . 
H3 H -0.5046 -0.0227 -1.1562 0.048 Uiso 1 1 calc R . . 
C4 C -0.6270(9) -0.0906(4) -1.1300(5) 0.029(2) Uani 1 1 d . . . 
C5 C -0.6723(10) -0.1420(4) -1.1528(5) 0.039(3) Uani 1 1 d . . . 
H5 H -0.7367 -0.1618 -1.1256 0.047 Uiso 1 1 calc R . . 
C6 C -0.6303(11) -0.1679(5) -1.2141(5) 0.047(3) Uani 1 1 d . . . 
H6 H -0.6593 -0.2053 -1.2270 0.057 Uiso 1 1 calc R . . 
C7 C -0.6683(9) -0.0656(4) -1.0625(4) 0.031(2) Uani 1 1 d . . . 
H7A H -0.7760 -0.0698 -1.0625 0.037 Uiso 1 1 calc R . . 
H7B H -0.6456 -0.0249 -1.0620 0.037 Uiso 1 1 calc R . . 
C8 C -0.6281(8) -0.0644(3) -0.9267(4) 0.025(2) Uani 1 1 d . . . 
H8A H -0.7301 -0.0744 -0.9191 0.030 Uiso 1 1 calc R . . 
H8B H -0.6222 -0.0230 -0.9311 0.030 Uiso 1 1 calc R . . 
C9 C -0.5204(9) -0.0843(4) -0.8617(5) 0.030(2) Uani 1 1 d . . . 
C10 C -0.4175(9) -0.0474(3) -0.8278(5) 0.033(2) Uani 1 1 d . . . 
H10 H -0.4158 -0.0097 -0.8449 0.039 Uiso 1 1 calc R . . 
C11 C -0.3174(9) -0.0637(4) -0.7698(4) 0.032(2) Uani 1 1 d . . . 
H11 H -0.2482 -0.0376 -0.7464 0.039 Uiso 1 1 calc R . . 
C12 C -0.3186(9) -0.1195(4) -0.7456(5) 0.029(2) Uani 1 1 d . . . 
C13 C -0.4238(8) -0.1563(4) -0.7770(5) 0.029(2) Uani 1 1 d . . . 
H13 H -0.4300 -0.1935 -0.7587 0.035 Uiso 1 1 calc R . . 
C14 C -0.5215(10) -0.1376(4) -0.8365(5) 0.034(2) Uani 1 1 d . . . 
H14 H -0.5914 -0.1634 -0.8602 0.040 Uiso 1 1 calc R . . 
C15 C -0.2125(9) -0.1350(3) -0.6825(5) 0.031(2) Uani 1 1 d . . . 
C16 C -0.1231(9) -0.1492(3) -0.6329(5) 0.028(2) Uani 1 1 d . . . 
C17 C -0.0202(9) -0.1674(4) -0.5741(4) 0.027(2) Uani 1 1 d . . . 
C18 C 0.0815(9) -0.1318(3) -0.5352(5) 0.027(2) Uani 1 1 d . . . 
C19 C 0.1826(9) -0.1526(4) -0.4795(5) 0.029(2) Uani 1 1 d . . . 
H19 H 0.2531 -0.1277 -0.4545 0.034 Uiso 1 1 calc R . . 
C20 C 0.1839(8) -0.2082(4) -0.4594(4) 0.027(2) Uani 1 1 d . . . 
H20 H 0.2528 -0.2215 -0.4202 0.032 Uiso 1 1 calc R . . 
C21 C 0.0823(9) -0.2450(4) -0.4975(4) 0.027(2) Uani 1 1 d . . . 
C22 C -0.0202(9) -0.2244(3) -0.5536(5) 0.029(2) Uani 1 1 d . . . 
H22 H -0.0912 -0.2492 -0.5784 0.035 Uiso 1 1 calc R . . 
C23 C 0.0789(9) -0.3048(4) -0.4817(5) 0.035(2) Uani 1 1 d . . . 
C24 C 0.1292(9) -0.3356(4) -0.4165(5) 0.027(2) Uani 1 1 d . . . 
C25 C 0.1922(10) -0.3167(4) -0.3419(4) 0.034(2) Uani 1 1 d . . . 
H25A H 0.2918 -0.3007 -0.3432 0.041 Uiso 1 1 calc R . . 
H25B H 0.1288 -0.2871 -0.3248 0.041 Uiso 1 1 calc R . . 
C26 C 0.2522(9) -0.4170(4) -0.3227(4) 0.032(2) Uani 1 1 d . . . 
H26A H 0.2695 -0.4457 -0.2839 0.038 Uiso 1 1 calc R . . 
H26B H 0.3471 -0.4098 -0.3413 0.038 Uiso 1 1 calc R . . 
C27 C 0.1404(10) -0.4398(4) -0.3849(5) 0.033(2) Uani 1 1 d . . . 
H27A H 0.1855 -0.4698 -0.4118 0.040 Uiso 1 1 calc R . . 
H27B H 0.0530 -0.4554 -0.3656 0.040 Uiso 1 1 calc R . . 
C28 C 0.0980(8) -0.3911(4) -0.4335(4) 0.027(2) Uani 1 1 d . B . 
C29 C -0.0149(9) -0.4409(3) -0.5489(4) 0.029(2) Uani 1 1 d . B . 
H29A H 0.0206 -0.4754 -0.5223 0.035 Uiso 1 1 calc R . . 
H29B H 0.0313 -0.4394 -0.5944 0.035 Uiso 1 1 calc R . . 
C30 C -0.1810(7) -0.4448(3) -0.5687(3) 0.041(3) Uani 1 1 d . . . 
H30A H -0.2282 -0.4381 -0.5243 0.049 Uiso 1 1 calc R A 1 
H30B H -0.2066 -0.4834 -0.5857 0.049 Uiso 1 1 calc R A 1 
C31 C -0.2473(9) -0.4016(4) -0.6296(5) 0.046(2) Uani 1 1 d . B 1 
H31A H -0.3533 -0.4096 -0.6439 0.056 Uiso 1 1 calc R B 1 
H31B H -0.2380 -0.3629 -0.6101 0.056 Uiso 1 1 calc R B 1 
C32 C -0.2155(7) -0.3648(3) -0.7508(4) 0.0411(18) Uani 1 1 d . B 1 
H32 H -0.3216 -0.3712 -0.7700 0.049 Uiso 1 1 calc R B 1 
C33 C -0.1207(9) -0.3706(4) -0.8125(4) 0.037(2) Uani 1 1 d . B 1 
H33A H -0.1494 -0.3413 -0.8496 0.045 Uiso 1 1 calc R B 1 
H33B H -0.0159 -0.3646 -0.7929 0.045 Uiso 1 1 calc R B 1 
C34 C -0.0994(8) -0.4688(4) -0.7916(4) 0.0297(18) Uani 1 1 d . B 1 
H34A H 0.0063 -0.4655 -0.7721 0.036 Uiso 1 1 calc R B 1 
H34B H -0.1151 -0.5062 -0.8146 0.036 Uiso 1 1 calc R B 1 
C35 C -0.1909(11) -0.4643(4) -0.7291(5) 0.056(2) Uani 1 1 d . B 1 
H35A H -0.2966 -0.4699 -0.7474 0.067 Uiso 1 1 calc R B 1 
H35B H -0.1605 -0.4937 -0.6924 0.067 Uiso 1 1 calc R B 1 
C36 C -0.1937(8) -0.3045(4) -0.7224(5) 0.041(2) Uani 1 1 d . B 1 
H36A H -0.0926 -0.3000 -0.6982 0.062 Uiso 1 1 calc R B 1 
H36B H -0.2633 -0.2968 -0.6876 0.062 Uiso 1 1 calc R B 1 
H36C H -0.2114 -0.2782 -0.7633 0.062 Uiso 1 1 calc R B 1 
C37 C 0.1936(6) -0.3544(2) -0.2216(3) 0.028(2) Uani 1 1 d . . . 
C38 C 0.2000(6) -0.4064(3) -0.1695(3) 0.030(2) Uani 1 1 d . . . 
N1 N -0.5908(5) -0.09180(19) -0.9957(3) 0.0215(16) Uani 1 1 d . . . 
H1A H -0.4907 -0.0894 -0.9967 0.026 Uiso 1 1 calc R . . 
H1B H -0.6153 -0.1293 -0.9951 0.026 Uiso 1 1 calc R . . 
N2 N 0.0218(8) -0.3416(3) -0.5336(4) 0.0287(18) Uani 1 1 d . B . 
N3 N 0.0330(8) -0.3927(3) -0.5049(4) 0.0297(18) Uani 1 1 d . . . 
N4 N -0.1672(7) -0.4062(3) -0.6949(4) 0.0309(10) Uani 1 1 d . B 1 
N5 N 0.2011(7) -0.3650(3) -0.2919(3) 0.0265(17) Uani 1 1 d . . . 
N6 N 0.2683(7) -0.3928(3) -0.1025(3) 0.0314(17) Uani 1 1 d . . . 
H6A H 0.2741 -0.4176 -0.0670 0.038 Uiso 1 1 calc R . . 
H6B H 0.3070 -0.3591 -0.0944 0.038 Uiso 1 1 calc R . . 
O1 O -0.1370(7) -0.4255(3) -0.8464(3) 0.0538(14) Uani 1 1 d . B 1 
O2 O 0.1829(6) -0.3069(2) -0.1970(3) 0.0344(16) Uani 1 1 d . . . 
O3 O 0.1428(7) -0.4510(2) -0.1875(3) 0.0331(15) Uani 1 1 d . . . 
C39 C -0.2621(9) -1.0300(4) -0.9960(4) 0.025(2) Uani 1 1 d . . . 
C40 C -0.0965(8) -1.0171(3) -0.9914(4) 0.0176(18) Uani 1 1 d . . . 
C41 C 0.0823(8) -0.9433(3) -0.9721(5) 0.027(2) Uani 1 1 d . . . 
H41A H 0.1408 -0.9566 -1.0101 0.032 Uiso 1 1 calc R . . 
H41B H 0.1262 -0.9587 -0.9245 0.032 Uiso 1 1 calc R . . 
C42 C 0.0790(8) -0.8796(3) -0.9698(5) 0.031(2) Uani 1 1 d . . . 
H42A H 0.1796 -0.8653 -0.9577 0.046 Uiso 1 1 calc R . . 
H42B H 0.0186 -0.8673 -0.9328 0.046 Uiso 1 1 calc R . . 
H42C H 0.0365 -0.8652 -1.0176 0.046 Uiso 1 1 calc R . . 
O4 O -0.2891(6) -1.0832(2) -0.9986(3) 0.0227(13) Uani 1 1 d . . . 
O5 O -0.3535(6) -0.9914(2) -0.9935(3) 0.0257(14) Uani 1 1 d . . . 
O6 O -0.0011(6) -1.0505(2) -0.9883(3) 0.0298(14) Uani 1 1 d . . . 
O7 O -0.0737(5) -0.9610(2) -0.9892(3) 0.0226(13) Uani 1 1 d . . . 
Cl1B Cl 0.0806(3) -0.06102(9) -0.55658(13) 0.0404(6) Uani 1 1 d . . . 
Cl2B Cl -0.4915(3) -0.16575(15) -1.33507(14) 0.0680(9) Uani 1 1 d . . . 
C1B C -0.0487(9) -1.1302(5) -1.2591(5) 0.040(3) Uani 1 1 d . . . 
C2B C -0.1284(9) -1.0976(4) -1.2164(4) 0.032(2) Uani 1 1 d . . . 
H2B H -0.1549 -1.0602 -1.2306 0.038 Uiso 1 1 calc R . . 
C3B C -0.1695(9) -1.1197(3) -1.1527(5) 0.028(2) Uani 1 1 d . . . 
H3B H -0.2243 -1.0976 -1.1230 0.034 Uiso 1 1 calc R . . 
C4B C -0.1286(8) -1.1759(4) -1.1321(4) 0.025(2) Uani 1 1 d . . . 
C5B C -0.0498(9) -1.2056(4) -1.1768(5) 0.032(2) Uani 1 1 d . . . 
H5B H -0.0222 -1.2432 -1.1643 0.039 Uiso 1 1 calc R . . 
C6B C -0.0093(10) -1.1831(4) -1.2392(6) 0.044(3) Uani 1 1 d . . . 
H6B1 H 0.0469 -1.2049 -1.2686 0.053 Uiso 1 1 calc R . . 
C7B C -0.1754(8) -1.2011(3) -1.0629(4) 0.025(2) Uani 1 1 d . . . 
H7B1 H -0.2826 -1.1955 -1.0628 0.031 Uiso 1 1 calc R . . 
H7B2 H -0.1558 -1.2421 -1.0617 0.031 Uiso 1 1 calc R . . 
C8B C -0.1250(8) -1.2001(4) -0.9279(5) 0.033(2) Uani 1 1 d . . . 
H8B1 H -0.2269 -1.1903 -0.9200 0.039 Uiso 1 1 calc R . . 
H8B2 H -0.1199 -1.2415 -0.9328 0.039 Uiso 1 1 calc R . . 
C9B C -0.0229(8) -1.1824(3) -0.8644(4) 0.022(2) Uani 1 1 d . . . 
C10B C -0.0285(9) -1.1259(3) -0.8385(5) 0.027(2) Uani 1 1 d . . . 
H10B H -0.1006 -1.1004 -0.8607 0.032 Uiso 1 1 calc R . . 
C11B C 0.0709(9) -1.1093(4) -0.7815(5) 0.034(2) Uani 1 1 d . . . 
H11B H 0.0699 -1.0712 -0.7661 0.041 Uiso 1 1 calc R . . 
C12B C 0.1752(9) -1.1460(3) -0.7441(5) 0.026(2) Uani 1 1 d . . . 
C13B C 0.1818(9) -1.2005(4) -0.7713(4) 0.028(2) Uani 1 1 d . . . 
H13B H 0.2552 -1.2256 -0.7493 0.033 Uiso 1 1 calc R . . 
C14B C 0.0842(8) -1.2187(4) -0.8296(4) 0.024(2) Uani 1 1 d . . . 
H14B H 0.0897 -1.2563 -0.8463 0.029 Uiso 1 1 calc R . . 
C15B C 0.2796(9) -1.1268(4) -0.6864(5) 0.028(2) Uani 1 1 d . . . 
C16B C 0.3702(10) -1.1157(4) -0.6366(5) 0.036(2) Uani 1 1 d . . . 
C17B C 0.4768(9) -1.0958(4) -0.5772(4) 0.032(2) Uani 1 1 d . . . 
C18B C 0.5775(10) -1.1320(4) -0.5362(5) 0.031(2) Uani 1 1 d . . . 
C19B C 0.6783(10) -1.1141(4) -0.4802(5) 0.035(2) Uani 1 1 d . . . 
H19B H 0.7459 -1.1395 -0.4540 0.042 Uiso 1 1 calc R . . 
C20B C 0.6783(9) -1.0568(4) -0.4628(5) 0.034(2) Uani 1 1 d . . . 
H20B H 0.7480 -1.0435 -0.4240 0.041 Uiso 1 1 calc R . . 
C21B C 0.5812(9) -1.0188(4) -0.4997(5) 0.027(2) Uani 1 1 d . . . 
C22B C 0.4837(10) -1.0401(4) -0.5574(4) 0.031(2) Uani 1 1 d . . . 
H22B H 0.4182 -1.0146 -0.5847 0.037 Uiso 1 1 calc R . . 
C23B C 0.5814(8) -0.9585(3) -0.4832(4) 0.0219(19) Uani 1 1 d . . . 
C24B C 0.6327(9) -0.9292(3) -0.4190(4) 0.026(2) Uani 1 1 d . . . 
C25B C 0.6913(9) -0.9489(3) -0.3436(4) 0.026(2) Uani 1 1 d . . . 
H25C H 0.6229 -0.9768 -0.3268 0.031 Uiso 1 1 calc R . . 
H25D H 0.7884 -0.9671 -0.3442 0.031 Uiso 1 1 calc R . . 
C26B C 0.7581(9) -0.8479(3) -0.3234(5) 0.031(2) Uani 1 1 d . . . 
H26C H 0.8522 -0.8545 -0.3431 0.037 Uiso 1 1 calc R . . 
H26D H 0.7759 -0.8197 -0.2839 0.037 Uiso 1 1 calc R . . 
C27B C 0.6437(10) -0.8262(3) -0.3830(5) 0.032(2) Uani 1 1 d . . . 
H27C H 0.6833 -0.7941 -0.4084 0.039 Uiso 1 1 calc R . . 
H27D H 0.5547 -0.8135 -0.3623 0.039 Uiso 1 1 calc R . . 
C28B C 0.6061(9) -0.8744(3) -0.4351(4) 0.026(2) Uani 1 1 d . D . 
C29B C 0.4861(10) -0.8226(4) -0.5487(5) 0.043(3) Uani 1 1 d . D . 
H29C H 0.5348 -0.8225 -0.5934 0.052 Uiso 1 1 calc R . . 
H29D H 0.5154 -0.7877 -0.5215 0.052 Uiso 1 1 calc R . . 
C30B C 0.3168(4) -0.82193(17) -0.5709(2) 0.045(3) Uani 1 1 d . . . 
H30C H 0.2749 -0.7908 -0.5447 0.054 Uiso 1 1 calc R C 1 
H30D H 0.2757 -0.8575 -0.5543 0.054 Uiso 1 1 calc R C 1 
C37B C 0.6973(4) -0.91049(17) -0.2226(2) 0.027(2) Uani 1 1 d R . . 
C38B C 0.6976(4) -0.86152(17) -0.1703(2) 0.023(2) Uani 1 1 d R . . 
N1B N -0.0919(4) -1.17371(17) -0.9961(2) 0.0238(17) Uani 1 1 d R . . 
H1B1 H -0.1158 -1.1362 -0.9955 0.029 Uiso 1 1 d R . . 
H1B2 H 0.0077 -1.1765 -0.9985 0.029 Uiso 1 1 d R . . 
N2B N 0.5244(9) -0.9236(3) -0.5368(4) 0.0349(19) Uani 1 1 d . D . 
N3B N 0.5401(8) -0.8710(3) -0.5038(4) 0.0288(17) Uani 1 1 d . . . 
N5B N 0.7064(7) -0.9009(3) -0.2941(4) 0.0282(17) Uani 1 1 d . . . 
N6B N 0.7756(7) -0.8700(3) -0.1072(3) 0.0272(16) Uani 1 1 d . . . 
H6B2 H 0.7831 -0.8434 -0.0739 0.033 Uiso 1 1 calc R . . 
H6B3 H 0.8207 -0.9024 -0.0978 0.033 Uiso 1 1 calc R . . 
O2B O 0.6833(7) -0.9586(2) -0.1978(3) 0.0365(16) Uani 1 1 d . . . 
O3B O 0.6303(6) -0.8176(3) -0.1886(3) 0.0358(15) Uani 1 1 d . . . 
C31B C 0.2627(10) -0.8149(4) -0.6559(5) 0.033(2) Uani 0.535(4) 1 d P D 1 
H31C H 0.1536 -0.8150 -0.6643 0.040 Uiso 0.535(4) 1 calc PR D 1 
H31D H 0.2974 -0.7783 -0.6727 0.040 Uiso 0.535(4) 1 calc PR D 1 
N4B N 0.3222(17) -0.8631(9) -0.7005(10) 0.0309(10) Uani 0.535(4) 1 d P D 1 
C32B C 0.3154(11) -0.8454(5) -0.7789(6) 0.042(2) Uani 0.535(4) 1 d P D 1 
H32A H 0.2104 -0.8417 -0.8015 0.050 Uiso 0.535(4) 1 calc PR D 1 
C33B C 0.379(8) -0.895(3) -0.805(5) 0.079(9) Uani 0.535(4) 1 d P D 1 
H33C H 0.4735 -0.9017 -0.7733 0.094 Uiso 0.535(4) 1 calc PR D 1 
H33D H 0.4043 -0.8866 -0.8541 0.094 Uiso 0.535(4) 1 calc PR D 1 
O1B O 0.3044(7) -0.9469(3) -0.8103(4) 0.0516(19) Uani 0.535(4) 1 d P D 1 
C34B C 0.304(2) -0.9613(7) -0.7330(9) 0.055(4) Uani 0.535(4) 1 d P D 1 
H34C H 0.4064 -0.9694 -0.7106 0.066 Uiso 0.535(4) 1 calc PR D 1 
H34D H 0.2444 -0.9956 -0.7292 0.066 Uiso 0.535(4) 1 calc PR D 1 
C35B C 0.2426(11) -0.9140(4) -0.6921(5) 0.040(2) Uani 0.535(4) 1 d P D 1 
H35C H 0.1371 -0.9085 -0.7108 0.048 Uiso 0.535(4) 1 calc PR D 1 
H35D H 0.2498 -0.9238 -0.6398 0.048 Uiso 0.535(4) 1 calc PR D 1 
C36B C 0.395(4) -0.7916(13) -0.7854(14) 0.104(6) Uani 0.535(4) 1 d P D 1 
H36D H 0.3423 -0.7611 -0.7641 0.157 Uiso 0.535(4) 1 calc PR D 1 
H36E H 0.3997 -0.7835 -0.8370 0.157 Uiso 0.535(4) 1 calc PR D 1 
H36F H 0.4951 -0.7946 -0.7595 0.157 Uiso 0.535(4) 1 calc PR D 1 
C31C C 0.2723(18) -0.8557(8) -0.6238(10) 0.033(2) Uani 0.46 1 d P D 2 
H31E H 0.1641 -0.8517 -0.6355 0.040 Uiso 0.465(4) 1 calc PR D 2 
H31F H 0.2925 -0.8947 -0.6066 0.040 Uiso 0.465(4) 1 calc PR D 2 
N4C N 0.3367(17) -0.8480(10) -0.6895(10) 0.0309(10) Uani 0.46 1 d P D 2 
C32C C 0.3299(16) -0.9055(8) -0.7317(8) 0.042(2) Uani 0.46 1 d P D 2 
H32B H 0.3884 -0.9346 -0.7015 0.050 Uiso 0.465(4) 1 calc PR D 2 
C33C C 0.409(9) -0.892(4) -0.811(5) 0.079(9) Uani 0.46 1 d P D 2 
H33E H 0.5182 -0.8922 -0.7989 0.094 Uiso 0.465(4) 1 calc PR D 2 
H33F H 0.3818 -0.9224 -0.8465 0.094 Uiso 0.465(4) 1 calc PR D 2 
O1C O 0.3694(15) -0.8470(7) -0.8375(7) 0.0516(19) Uani 0.46 1 d P D 2 
C34C C 0.388(4) -0.7992(11) -0.7985(15) 0.055(4) Uani 0.46 1 d P D 2 
H34E H 0.3490 -0.7666 -0.8280 0.066 Uiso 0.465(4) 1 calc PR D 2 
H34F H 0.4941 -0.7927 -0.7815 0.066 Uiso 0.465(4) 1 calc PR D 2 
C35C C 0.300(2) -0.8083(9) -0.7323(10) 0.040(2) Uani 0.46 1 d P D 2 
H35E H 0.3069 -0.7731 -0.7034 0.048 Uiso 0.465(4) 1 calc PR D 2 
H35F H 0.1951 -0.8135 -0.7519 0.048 Uiso 0.465(4) 1 calc PR D 2 
C36C C 0.1819(19) -0.9266(10) -0.7562(9) 0.104(6) Uani 0.46 1 d P D 2 
H36G H 0.1310 -0.9343 -0.7139 0.157 Uiso 0.465(4) 1 calc PR D 2 
H36H H 0.1887 -0.9613 -0.7841 0.157 Uiso 0.465(4) 1 calc PR D 2 
H36I H 0.1266 -0.8983 -0.7872 0.157 Uiso 0.465(4) 1 calc PR D 2 
C39B C -0.7669(8) -0.2353(3) -0.9952(4) 0.0173(18) Uani 1 1 d . . . 
C40B C -0.6026(9) -0.2516(4) -0.9899(4) 0.026(2) Uani 1 1 d . . . 
C41B C -0.4298(8) -0.3242(3) -0.9678(5) 0.034(2) Uani 1 1 d . . . 
H41C H -0.3898 -0.3075 -0.9204 0.040 Uiso 1 1 calc R . . 
H41D H -0.3680 -0.3116 -1.0049 0.040 Uiso 1 1 calc R . . 
C42B C -0.4268(9) -0.3868(3) -0.9625(5) 0.035(2) Uani 1 1 d . . . 
H42D H -0.3247 -0.3995 -0.9500 0.053 Uiso 1 1 calc R . . 
H42E H -0.4682 -0.4030 -1.0094 0.053 Uiso 1 1 calc R . . 
H42F H -0.4854 -0.3989 -0.9247 0.053 Uiso 1 1 calc R . . 
O4B O -0.7915(6) -0.1835(2) -0.9997(3) 0.0262(14) Uani 1 1 d . . . 
O5B O -0.8551(6) -0.2736(2) -0.9955(3) 0.0265(14) Uani 1 1 d . . . 
O6B O -0.5039(6) -0.2158(2) -0.9868(3) 0.0314(15) Uani 1 1 d . . . 
O7B O -0.5789(5) -0.3063(2) -0.9879(3) 0.0230(13) Uani 1 1 d . . . 
 
loop_ 
 _atom_site_aniso_label 
 _atom_site_aniso_U_11 
 _atom_site_aniso_U_22 
 _atom_site_aniso_U_33 
 _atom_site_aniso_U_23 
 _atom_site_aniso_U_13 
 _atom_site_aniso_U_12 
Cl1 0.0531(14) 0.0283(13) 0.0437(15) 0.0012(11) 0.0077(11) -0.0123(11) 
Cl2 0.0541(14) 0.0618(16) 0.0342(14) 0.0022(13) 0.0172(11) -0.0005(13) 
C1 0.044(5) 0.044(6) 0.017(5) 0.006(4) -0.002(4) 0.004(5) 
C2 0.021(4) 0.057(8) 0.039(6) 0.020(5) 0.009(4) -0.006(4) 
C3 0.025(4) 0.048(6) 0.047(6) 0.021(5) 0.002(4) -0.010(4) 
C4 0.028(5) 0.028(6) 0.029(5) 0.011(5) -0.001(4) 0.003(4) 
C5 0.033(5) 0.055(7) 0.030(6) -0.007(5) 0.007(4) -0.015(5) 
C6 0.058(6) 0.048(7) 0.037(6) 0.003(5) 0.008(5) -0.013(6) 
C7 0.030(5) 0.031(5) 0.029(5) 0.010(4) -0.005(4) 0.001(4) 
C8 0.016(4) 0.030(5) 0.026(4) -0.008(4) -0.006(3) 0.017(4) 
C9 0.030(5) 0.033(6) 0.028(5) -0.006(4) 0.006(4) 0.010(4) 
C10 0.045(5) 0.006(4) 0.044(6) -0.001(4) -0.004(4) -0.001(4) 
C11 0.026(5) 0.039(6) 0.029(5) 0.004(4) -0.002(4) -0.007(4) 
C12 0.027(5) 0.038(6) 0.024(5) 0.007(4) 0.007(4) 0.000(4) 
C13 0.031(5) 0.019(5) 0.038(5) 0.008(4) 0.010(4) 0.007(4) 
C14 0.031(5) 0.036(6) 0.036(6) -0.004(5) 0.010(4) -0.006(4) 
C15 0.045(5) 0.015(4) 0.036(5) 0.006(4) 0.011(5) 0.008(4) 
C16 0.035(5) 0.021(5) 0.030(5) 0.002(4) 0.011(4) 0.002(4) 
C17 0.033(5) 0.020(5) 0.030(5) -0.001(4) 0.008(4) 0.013(4) 
C18 0.026(5) 0.019(5) 0.036(5) -0.003(4) 0.008(4) 0.002(4) 
C19 0.025(4) 0.031(6) 0.030(5) -0.002(4) 0.006(4) 0.000(4) 
C20 0.031(4) 0.029(5) 0.021(5) -0.002(4) 0.006(4) -0.005(4) 
C21 0.037(5) 0.028(5) 0.015(5) 0.011(4) 0.003(4) 0.004(4) 
C22 0.031(5) 0.022(5) 0.036(5) -0.001(4) 0.014(4) -0.002(4) 
C23 0.036(5) 0.036(6) 0.034(5) -0.004(5) 0.009(4) -0.007(4) 
C24 0.028(5) 0.029(5) 0.026(5) 0.002(4) 0.009(4) 0.002(4) 
C25 0.047(5) 0.022(5) 0.032(5) -0.009(4) 0.007(4) 0.007(4) 
C26 0.037(5) 0.044(6) 0.016(4) 0.009(4) 0.012(4) 0.012(4) 
C27 0.040(5) 0.032(6) 0.029(5) 0.004(4) 0.006(4) -0.005(4) 
C28 0.023(4) 0.023(5) 0.035(5) 0.004(4) 0.007(4) -0.003(4) 
C29 0.037(5) 0.021(5) 0.027(5) 0.004(4) -0.008(4) -0.003(4) 
C30 0.053(6) 0.044(6) 0.031(5) -0.010(5) 0.022(5) -0.016(5) 
C31 0.039(4) 0.051(5) 0.050(4) 0.007(4) 0.010(3) 0.001(3) 
C32 0.029(4) 0.042(4) 0.048(4) -0.002(3) -0.012(3) 0.009(3) 
C33 0.041(4) 0.041(6) 0.028(5) 0.003(4) -0.001(3) 0.008(4) 
C34 0.037(4) 0.029(4) 0.021(4) -0.012(3) -0.003(3) -0.004(3) 
C35 0.075(5) 0.033(4) 0.059(5) -0.009(4) 0.005(4) -0.013(4) 
C36 0.031(4) 0.054(5) 0.039(4) 0.004(4) 0.006(3) 0.018(3) 
C37 0.045(5) 0.021(5) 0.017(5) 0.004(4) 0.000(4) 0.016(4) 
C38 0.033(5) 0.040(6) 0.020(5) 0.009(4) 0.017(4) 0.013(4) 
N1 0.014(3) 0.010(4) 0.040(4) 0.000(3) 0.002(3) -0.002(3) 
N2 0.035(4) 0.024(4) 0.026(4) 0.007(4) -0.001(3) 0.002(3) 
N3 0.036(4) 0.033(5) 0.020(4) -0.004(4) 0.002(3) -0.008(4) 
N4 0.0379(16) 0.025(4) 0.030(2) 0.000(3) 0.0037(15) -0.003(3) 
N5 0.039(4) 0.018(4) 0.020(4) 0.003(3) -0.004(3) 0.005(3) 
N6 0.033(4) 0.041(4) 0.017(4) 0.005(3) -0.005(3) -0.006(3) 
O1 0.063(3) 0.067(4) 0.028(3) -0.013(2) -0.005(2) 0.012(3) 
O2 0.047(4) 0.024(4) 0.033(4) 0.009(3) 0.008(3) 0.013(3) 
O3 0.053(4) 0.023(4) 0.023(3) -0.004(3) 0.005(3) -0.008(3) 
C39 0.029(5) 0.037(6) 0.008(4) -0.007(4) 0.000(3) 0.008(4) 
C40 0.014(4) 0.013(4) 0.025(5) -0.005(3) 0.000(3) -0.010(3) 
C41 0.024(4) 0.026(5) 0.031(4) -0.001(4) 0.003(3) -0.008(3) 
C42 0.013(4) 0.035(5) 0.044(5) -0.010(4) 0.003(3) -0.005(3) 
O4 0.022(3) 0.009(3) 0.039(4) -0.006(3) 0.011(2) -0.006(2) 
O5 0.024(3) 0.017(3) 0.038(4) -0.001(3) 0.011(3) 0.002(3) 
O6 0.021(3) 0.023(4) 0.045(4) -0.002(3) 0.001(3) 0.009(3) 
O7 0.015(3) 0.025(3) 0.028(3) 0.000(3) 0.002(2) 0.001(2) 
Cl1B 0.0536(14) 0.0202(12) 0.0468(15) 0.0036(11) 0.0042(11) 0.0031(11) 
Cl2B 0.0529(15) 0.119(3) 0.0331(15) -0.0103(16) 0.0093(12) -0.0058(17) 
C1B 0.023(4) 0.071(8) 0.027(5) -0.005(5) 0.006(4) 0.012(5) 
C2B 0.031(5) 0.034(5) 0.029(5) 0.010(5) 0.000(4) 0.011(4) 
C3B 0.041(5) 0.017(4) 0.027(5) -0.007(4) 0.006(4) 0.008(4) 
C4B 0.012(4) 0.029(5) 0.032(5) -0.008(5) -0.003(4) 0.002(4) 
C5B 0.034(4) 0.024(5) 0.038(5) 0.003(4) 0.002(4) -0.001(4) 
C6B 0.046(6) 0.038(7) 0.050(7) -0.020(5) 0.011(5) 0.009(5) 
C7B 0.021(4) 0.013(4) 0.042(6) -0.003(4) -0.001(4) -0.004(4) 
C8B 0.032(5) 0.028(5) 0.042(6) 0.009(4) 0.016(4) 0.013(4) 
C9B 0.017(4) 0.023(5) 0.029(5) 0.005(4) 0.013(4) 0.002(4) 
C10B 0.030(5) 0.028(5) 0.022(5) 0.000(4) 0.006(4) 0.004(4) 
C11B 0.042(5) 0.035(6) 0.027(5) -0.001(4) 0.011(4) 0.012(4) 
C12B 0.030(5) 0.022(5) 0.026(5) 0.005(4) 0.008(4) -0.008(4) 
C13B 0.030(5) 0.019(5) 0.033(5) 0.010(4) 0.003(4) -0.006(4) 
C14B 0.018(4) 0.035(5) 0.020(5) 0.001(4) 0.006(3) -0.009(4) 
C15B 0.024(4) 0.035(5) 0.025(5) 0.002(4) 0.006(4) 0.017(4) 
C16B 0.034(5) 0.035(6) 0.038(6) -0.006(4) 0.005(5) 0.000(4) 
C17B 0.035(5) 0.038(6) 0.024(5) -0.007(4) 0.005(4) 0.002(4) 
C18B 0.038(5) 0.035(6) 0.022(5) -0.009(4) 0.013(4) -0.007(4) 
C19B 0.054(6) 0.020(5) 0.030(5) 0.002(4) 0.005(5) 0.004(4) 
C20B 0.043(5) 0.031(6) 0.027(5) -0.003(4) -0.003(4) -0.012(5) 
C21B 0.036(5) 0.018(5) 0.032(5) 0.007(4) 0.015(4) -0.003(4) 
C22B 0.039(5) 0.045(6) 0.007(4) -0.002(4) -0.005(4) -0.001(4) 
C23B 0.023(4) 0.023(5) 0.020(4) -0.003(4) 0.004(3) -0.007(4) 
C24B 0.036(5) 0.021(5) 0.021(5) 0.002(4) 0.006(4) -0.004(4) 
C25B 0.030(5) 0.026(5) 0.021(5) -0.016(4) 0.002(4) -0.005(4) 
C26B 0.047(5) 0.008(4) 0.036(5) 0.000(4) 0.006(4) -0.003(4) 
C27B 0.052(6) 0.019(5) 0.029(5) 0.004(4) 0.015(4) -0.010(4) 
C28B 0.044(5) 0.027(5) 0.010(4) -0.002(4) 0.012(4) -0.009(4) 
C29B 0.075(7) 0.027(5) 0.036(5) 0.008(4) 0.037(5) 0.008(5) 
C30B 0.047(6) 0.042(7) 0.048(6) -0.003(5) 0.010(5) 0.015(5) 
C37B 0.011(4) 0.035(6) 0.036(5) 0.003(5) 0.007(3) 0.005(4) 
C38B 0.025(4) 0.013(5) 0.031(5) 0.004(4) -0.001(4) 0.005(4) 
N1B 0.022(4) 0.025(4) 0.025(4) 0.001(3) 0.002(3) 0.004(3) 
N2B 0.054(5) 0.027(5) 0.026(4) 0.002(4) 0.014(4) 0.002(4) 
N3B 0.041(4) 0.017(4) 0.030(4) -0.001(3) 0.009(3) 0.000(3) 
N5B 0.043(4) 0.020(4) 0.025(4) -0.002(3) 0.018(3) -0.010(3) 
N6B 0.043(4) 0.010(3) 0.030(4) -0.007(3) 0.009(3) 0.008(3) 
O2B 0.061(4) 0.024(4) 0.024(3) 0.009(3) 0.005(3) -0.008(3) 
O3B 0.037(3) 0.029(4) 0.042(4) 0.000(3) 0.006(3) 0.004(3) 
C31B 0.025(4) 0.041(6) 0.033(5) 0.012(4) 0.002(4) 0.006(4) 
N4B 0.0379(16) 0.025(4) 0.030(2) 0.000(3) 0.0037(15) -0.003(3) 
C32B 0.035(5) 0.052(6) 0.038(6) -0.005(4) 0.006(4) 0.003(4) 
C33B 0.11(2) 0.073(11) 0.068(14) 0.017(9) 0.076(17) -0.002(15) 
O1B 0.040(4) 0.075(5) 0.038(4) -0.018(4) -0.003(3) 0.003(3) 
C34B 0.084(10) 0.026(7) 0.050(9) -0.004(6) -0.007(7) 0.019(7) 
C35B 0.037(5) 0.059(6) 0.026(5) 0.004(5) 0.011(4) 0.005(4) 
C36B 0.079(10) 0.187(17) 0.045(9) 0.011(9) 0.001(7) -0.037(11) 
C31C 0.025(4) 0.041(6) 0.033(5) 0.012(4) 0.002(4) 0.006(4) 
N4C 0.0379(16) 0.025(4) 0.030(2) 0.000(3) 0.0037(15) -0.003(3) 
C32C 0.035(5) 0.052(6) 0.038(6) -0.005(4) 0.006(4) 0.003(4) 
C33C 0.11(2) 0.073(11) 0.068(14) 0.017(9) 0.076(17) -0.002(15) 
O1C 0.040(4) 0.075(5) 0.038(4) -0.018(4) -0.003(3) 0.003(3) 
C34C 0.084(10) 0.026(7) 0.050(9) -0.004(6) -0.007(7) 0.019(7) 
C35C 0.037(5) 0.059(6) 0.026(5) 0.004(5) 0.011(4) 0.005(4) 
C36C 0.079(10) 0.187(17) 0.045(9) 0.011(9) 0.001(7) -0.037(11) 
C39B 0.016(4) 0.008(4) 0.029(5) -0.006(4) 0.005(3) 0.003(3) 
C40B 0.036(5) 0.025(5) 0.020(5) -0.009(4) 0.007(4) -0.014(4) 
C41B 0.015(4) 0.018(4) 0.067(6) -0.003(4) 0.002(4) -0.003(3) 
C42B 0.038(5) 0.016(5) 0.051(5) -0.004(4) -0.001(4) 0.002(4) 
O4B 0.021(3) 0.021(4) 0.036(4) 0.000(3) 0.003(2) -0.003(3) 
O5B 0.024(3) 0.020(3) 0.034(4) 0.002(3) -0.004(3) -0.004(3) 
O6B 0.020(3) 0.020(3) 0.056(4) -0.002(3) 0.010(3) 0.004(3) 
O7B 0.023(3) 0.007(3) 0.039(4) 0.003(3) 0.005(2) 0.002(2) 
 
_geom_special_details 
; 
 All esds (except the esd in the dihedral angle between two l.s. planes) 
 are estimated using the full covariance matrix.  The cell esds are taken 
 into account individually in the estimation of esds in distances, angles 
 and torsion angles; correlations between esds in cell parameters are only 
 used when they are defined by crystal symmetry.  An approximate (isotropic) 
 treatment of cell esds is used for estimating esds involving l.s. planes. 
; 
 
loop_ 
 _geom_bond_atom_site_label_1 
 _geom_bond_atom_site_label_2 
 _geom_bond_distance 
 _geom_bond_site_symmetry_2 
 _geom_bond_publ_flag 
Cl1 C18B 1.745(9) . ? 
Cl2 C1B 1.755(10) . ? 
C1 C2 1.365(13) . ? 
C1 C6 1.390(13) . ? 
C1 Cl2B 1.752(9) . ? 
C2 C3 1.408(12) . ? 
C2 H2 0.9500 . ? 
C3 C4 1.403(12) . ? 
C3 H3 0.9500 . ? 
C4 C5 1.342(12) . ? 
C4 C7 1.476(11) . ? 
C5 C6 1.387(12) . ? 
C5 H5 0.9500 . ? 
C6 H6 0.9500 . ? 
C7 N1 1.481(9) . ? 
C7 H7A 0.9900 . ? 
C7 H7B 0.9900 . ? 
C8 N1 1.512(8) . ? 
C8 C9 1.526(10) . ? 
C8 H8A 0.9900 . ? 
C8 H8B 0.9900 . ? 
C9 C14 1.353(12) . ? 
C9 C10 1.377(11) . ? 
C10 C11 1.373(11) . ? 
C10 H10 0.9500 . ? 
C11 C12 1.401(12) . ? 
C11 H11 0.9500 . ? 
C12 C13 1.373(12) . ? 
C12 C15 1.465(12) . ? 
C13 C14 1.398(12) . ? 
C13 H13 0.9500 . ? 
C14 H14 0.9500 . ? 
C15 C16 1.195(12) . ? 
C16 C17 1.410(11) . ? 
C17 C18 1.387(12) . ? 
C17 C22 1.407(11) . ? 
C18 C19 1.384(12) . ? 
C18 Cl1B 1.729(8) . ? 
C19 C20 1.374(11) . ? 
C19 H19 0.9500 . ? 
C20 C21 1.398(11) . ? 
C20 H20 0.9500 . ? 
C21 C22 1.394(11) . ? 
C21 C23 1.453(11) . ? 
C22 H22 0.9500 . ? 
C23 N2 1.353(10) . ? 
C23 C24 1.436(12) . ? 
C24 C28 1.378(11) . ? 
C24 C25 1.494(11) . ? 
C25 N5 1.472(10) . ? 
C25 H25A 0.9900 . ? 
C25 H25B 0.9900 . ? 
C26 N5 1.464(10) . ? 
C26 C27 1.535(12) . ? 
C26 H26A 0.9900 . ? 
C26 H26B 0.9900 . ? 
C27 C28 1.486(11) . ? 
C27 H27A 0.9900 . ? 
C27 H27B 0.9900 . ? 
C28 N3 1.377(10) . ? 
C29 N3 1.441(10) . ? 
C29 C30 1.518(10) . ? 
C29 H29A 0.9900 . ? 
C29 H29B 0.9900 . ? 
C30 C31 1.585(10) . ? 
C30 H30A 0.9900 . ? 
C30 H30B 0.9900 . ? 
C31 N4 1.497(10) . ? 
C31 H31A 0.9900 . ? 
C31 H31B 0.9900 . ? 
C32 N4 1.454(9) . ? 
C32 C33 1.528(10) . ? 
C32 C36 1.532(11) . ? 
C32 H32 1.0000 . ? 
C33 O1 1.447(10) . ? 
C33 H33A 0.9900 . ? 
C33 H33B 0.9900 . ? 
C34 O1 1.455(10) . ? 
C34 C35 1.516(12) . ? 
C34 H34A 0.9900 . ? 
C34 H34B 0.9900 . ? 
C35 N4 1.524(10) . ? 
C35 H35A 0.9900 . ? 
C35 H35B 0.9900 . ? 
C36 H36A 0.9800 . ? 
C36 H36B 0.9800 . ? 
C36 H36C 0.9800 . ? 
C37 O2 1.226(7) . ? 
C37 N5 1.337(8) . ? 
C37 C38 1.563(7) . ? 
C38 O3 1.209(8) . ? 
C38 N6 1.354(9) . ? 
N1 H1A 0.9200 . ? 
N1 H1B 0.9200 . ? 
N2 N3 1.324(9) . ? 
N6 H6A 0.8800 . ? 
N6 H6B 0.8800 . ? 
C39 O5 1.246(9) . ? 
C39 O4 1.289(9) . ? 
C39 C40 1.537(10) . ? 
C40 O6 1.176(9) . ? 
C40 O7 1.349(9) . ? 
C41 O7 1.482(8) . ? 
C41 C42 1.516(10) . ? 
C41 H41A 0.9900 . ? 
C41 H41B 0.9900 . ? 
C42 H42A 0.9800 . ? 
C42 H42B 0.9800 . ? 
C42 H42C 0.9800 . ? 
C1B C6B 1.348(13) . ? 
C1B C2B 1.381(12) . ? 
C2B C3B 1.387(11) . ? 
C2B H2B 0.9500 . ? 
C3B C4B 1.427(11) . ? 
C3B H3B 0.9500 . ? 
C4B C5B 1.363(12) . ? 
C4B C7B 1.526(11) . ? 
C5B C6B 1.366(12) . ? 
C5B H5B 0.9500 . ? 
C6B H6B1 0.9500 . ? 
C7B N1B 1.512(8) . ? 
C7B H7B1 0.9900 . ? 
C7B H7B2 0.9900 . ? 
C8B C9B 1.464(11) . ? 
C8B N1B 1.477(9) . ? 
C8B H8B1 0.9900 . ? 
C8B H8B2 0.9900 . ? 
C9B C14B 1.398(10) . ? 
C9B C10B 1.430(11) . ? 
C10B C11B 1.358(12) . ? 
C10B H10B 0.9500 . ? 
C11B C12B 1.406(12) . ? 
C11B H11B 0.9500 . ? 
C12B C13B 1.396(11) . ? 
C12B C15B 1.411(12) . ? 
C13B C14B 1.375(10) . ? 
C13B H13B 0.9500 . ? 
C14B H14B 0.9500 . ? 
C15B C16B 1.186(12) . ? 
C16B C17B 1.451(12) . ? 
C17B C22B 1.372(12) . ? 
C17B C18B 1.409(12) . ? 
C18B C19B 1.362(12) . ? 
C19B C20B 1.400(12) . ? 
C19B H19B 0.9500 . ? 
C20B C21B 1.385(12) . ? 
C20B H20B 0.9500 . ? 
C21B C22B 1.394(11) . ? 
C21B C23B 1.466(11) . ? 
C22B H22B 0.9500 . ? 
C23B N2B 1.345(10) . ? 
C23B C24B 1.404(11) . ? 
C24B C28B 1.351(11) . ? 
C24B C25B 1.503(10) . ? 
C25B N5B 1.458(9) . ? 
C25B H25C 0.9900 . ? 
C25B H25D 0.9900 . ? 
C26B N5B 1.475(10) . ? 
C26B C27B 1.509(11) . ? 
C26B H26C 0.9900 . ? 
C26B H26D 0.9900 . ? 
C27B C28B 1.510(11) . ? 
C27B H27C 0.9900 . ? 
C27B H27D 0.9900 . ? 
C28B N3B 1.338(10) . ? 
C29B N3B 1.466(10) . ? 
C29B C30B 1.550(10) . ? 
C29B H29C 0.9900 . ? 
C29B H29D 0.9900 . ? 
C30B C31C 1.290(19) . ? 
C30B C31B 1.595(10) . ? 
C30B H30C 0.9900 . ? 
C30B H30D 0.9900 . ? 
C37B O2B 1.246(7) . ? 
C37B N5B 1.357(7) . ? 
C37B C38B 1.5144 . ? 
C38B O3B 1.238(7) . ? 
C38B N6B 1.302(7) . ? 
N1B H1B1 0.9200 . ? 
N1B H1B2 0.9200 . ? 
N2B N3B 1.391(9) . ? 
N6B H6B2 0.8800 . ? 
N6B H6B3 0.8800 . ? 
C31B N4B 1.553(19) . ? 
C31B H31C 0.9900 . ? 
C31B H31D 0.9900 . ? 
N4B C35B 1.43(2) . ? 
N4B C32B 1.50(2) . ? 
C32B C33B 1.43(8) . ? 
C32B C36B 1.48(3) . ? 
C32B H32A 1.0000 . ? 
C33B O1B 1.40(7) . ? 
C33B H33C 0.9900 . ? 
C33B H33D 0.9900 . ? 
O1B C34B 1.472(19) . ? 
C34B C35B 1.505(19) . ? 
C34B H34C 0.9900 . ? 
C34B H34D 0.9900 . ? 
C35B H35C 0.9900 . ? 
C35B H35D 0.9900 . ? 
C36B H36D 0.9800 . ? 
C36B H36E 0.9800 . ? 
C36B H36F 0.9800 . ? 
C31C N4C 1.43(2) . ? 
C31C H31E 0.9900 . ? 
C31C H31F 0.9900 . ? 
N4C C35C 1.25(3) . ? 
N4C C32C 1.57(2) . ? 
C32C C36C 1.46(2) . ? 
C32C C33C 1.75(9) . ? 
C32C H32B 1.0000 . ? 
C33C O1C 1.22(9) . ? 
C33C H33E 0.9900 . ? 
C33C H33F 0.9900 . ? 
O1C C34C 1.34(3) . ? 
C34C C35C 1.57(4) . ? 
C34C H34E 0.9900 . ? 
C34C H34F 0.9900 . ? 
C35C H35E 0.9900 . ? 
C35C H35F 0.9900 . ? 
C36C H36G 0.9800 . ? 
C36C H36H 0.9800 . ? 
C36C H36I 0.9800 . ? 
C39B O5B 1.216(9) . ? 
C39B O4B 1.254(8) . ? 
C39B C40B 1.542(10) . ? 
C40B O6B 1.237(9) . ? 
C40B O7B 1.318(9) . ? 
C41B O7B 1.431(8) . ? 
C41B C42B 1.492(10) . ? 
C41B H41C 0.9900 . ? 
C41B H41D 0.9900 . ? 
C42B H42D 0.9800 . ? 
C42B H42E 0.9800 . ? 
C42B H42F 0.9800 . ? 
 
loop_ 
 _geom_angle_atom_site_label_1 
 _geom_angle_atom_site_label_2 
 _geom_angle_atom_site_label_3 
 _geom_angle 
 _geom_angle_site_symmetry_1 
 _geom_angle_site_symmetry_3 
 _geom_angle_publ_flag 
C2 C1 C6 121.3(9) . . ? 
C2 C1 Cl2B 119.4(8) . . ? 
C6 C1 Cl2B 119.2(8) . . ? 
C1 C2 C3 120.4(9) . . ? 
C1 C2 H2 119.8 . . ? 
C3 C2 H2 119.8 . . ? 
C2 C3 C4 118.1(9) . . ? 
C2 C3 H3 120.9 . . ? 
C4 C3 H3 120.9 . . ? 
C5 C4 C3 119.4(9) . . ? 
C5 C4 C7 122.0(8) . . ? 
C3 C4 C7 118.6(9) . . ? 
C4 C5 C6 123.7(9) . . ? 
C4 C5 H5 118.1 . . ? 
C6 C5 H5 118.1 . . ? 
C5 C6 C1 116.8(10) . . ? 
C5 C6 H6 121.6 . . ? 
C1 C6 H6 121.6 . . ? 
C4 C7 N1 113.0(7) . . ? 
C4 C7 H7A 109.0 . . ? 
N1 C7 H7A 109.0 . . ? 
C4 C7 H7B 109.0 . . ? 
N1 C7 H7B 109.0 . . ? 
H7A C7 H7B 107.8 . . ? 
N1 C8 C9 109.8(5) . . ? 
N1 C8 H8A 109.7 . . ? 
C9 C8 H8A 109.7 . . ? 
N1 C8 H8B 109.7 . . ? 
C9 C8 H8B 109.7 . . ? 
H8A C8 H8B 108.2 . . ? 
C14 C9 C10 118.4(8) . . ? 
C14 C9 C8 122.0(8) . . ? 
C10 C9 C8 119.6(8) . . ? 
C11 C10 C9 121.5(8) . . ? 
C11 C10 H10 119.2 . . ? 
C9 C10 H10 119.2 . . ? 
C10 C11 C12 119.1(8) . . ? 
C10 C11 H11 120.5 . . ? 
C12 C11 H11 120.5 . . ? 
C13 C12 C11 120.2(8) . . ? 
C13 C12 C15 122.1(8) . . ? 
C11 C12 C15 117.5(8) . . ? 
C12 C13 C14 118.1(8) . . ? 
C12 C13 H13 120.9 . . ? 
C14 C13 H13 120.9 . . ? 
C9 C14 C13 122.6(9) . . ? 
C9 C14 H14 118.7 . . ? 
C13 C14 H14 118.7 . . ? 
C16 C15 C12 177.2(9) . . ? 
C15 C16 C17 178.3(10) . . ? 
C18 C17 C22 118.1(8) . . ? 
C18 C17 C16 123.3(8) . . ? 
C22 C17 C16 118.7(8) . . ? 
C19 C18 C17 120.4(8) . . ? 
C19 C18 Cl1B 120.1(7) . . ? 
C17 C18 Cl1B 119.5(7) . . ? 
C20 C19 C18 121.9(8) . . ? 
C20 C19 H19 119.1 . . ? 
C18 C19 H19 119.1 . . ? 
C19 C20 C21 118.9(8) . . ? 
C19 C20 H20 120.5 . . ? 
C21 C20 H20 120.5 . . ? 
C22 C21 C20 119.6(8) . . ? 
C22 C21 C23 117.7(8) . . ? 
C20 C21 C23 122.8(7) . . ? 
C21 C22 C17 121.1(8) . . ? 
C21 C22 H22 119.4 . . ? 
C17 C22 H22 119.4 . . ? 
N2 C23 C24 108.6(8) . . ? 
N2 C23 C21 120.5(8) . . ? 
C24 C23 C21 130.9(8) . . ? 
C28 C24 C23 105.2(8) . . ? 
C28 C24 C25 122.9(8) . . ? 
C23 C24 C25 131.8(8) . . ? 
N5 C25 C24 109.2(7) . . ? 
N5 C25 H25A 109.8 . . ? 
C24 C25 H25A 109.8 . . ? 
N5 C25 H25B 109.8 . . ? 
C24 C25 H25B 109.8 . . ? 
H25A C25 H25B 108.3 . . ? 
N5 C26 C27 112.1(7) . . ? 
N5 C26 H26A 109.2 . . ? 
C27 C26 H26A 109.2 . . ? 
N5 C26 H26B 109.2 . . ? 
C27 C26 H26B 109.2 . . ? 
H26A C26 H26B 107.9 . . ? 
C28 C27 C26 105.9(7) . . ? 
C28 C27 H27A 110.6 . . ? 
C26 C27 H27A 110.6 . . ? 
C28 C27 H27B 110.6 . . ? 
C26 C27 H27B 110.6 . . ? 
H27A C27 H27B 108.7 . . ? 
N3 C28 C24 107.2(7) . . ? 
N3 C28 C27 127.2(7) . . ? 
C24 C28 C27 125.4(8) . . ? 
N3 C29 C30 113.9(7) . . ? 
N3 C29 H29A 108.8 . . ? 
C30 C29 H29A 108.8 . . ? 
N3 C29 H29B 108.8 . . ? 
C30 C29 H29B 108.8 . . ? 
H29A C29 H29B 107.7 . . ? 
C29 C30 C31 114.1(6) . . ? 
C29 C30 H30A 108.7 . . ? 
C31 C30 H30A 108.7 . . ? 
C29 C30 H30B 108.7 . . ? 
C31 C30 H30B 108.7 . . ? 
H30A C30 H30B 107.6 . . ? 
N4 C31 C30 110.2(6) . . ? 
N4 C31 H31A 109.6 . . ? 
C30 C31 H31A 109.6 . . ? 
N4 C31 H31B 109.6 . . ? 
C30 C31 H31B 109.6 . . ? 
H31A C31 H31B 108.1 . . ? 
N4 C32 C33 108.7(6) . . ? 
N4 C32 C36 112.1(6) . . ? 
C33 C32 C36 106.2(6) . . ? 
N4 C32 H32 109.9 . . ? 
C33 C32 H32 109.9 . . ? 
C36 C32 H32 109.9 . . ? 
O1 C33 C32 111.7(7) . . ? 
O1 C33 H33A 109.3 . . ? 
C32 C33 H33A 109.3 . . ? 
O1 C33 H33B 109.3 . . ? 
C32 C33 H33B 109.3 . . ? 
H33A C33 H33B 107.9 . . ? 
O1 C34 C35 112.3(7) . . ? 
O1 C34 H34A 109.1 . . ? 
C35 C34 H34A 109.1 . . ? 
O1 C34 H34B 109.1 . . ? 
C35 C34 H34B 109.1 . . ? 
H34A C34 H34B 107.9 . . ? 
N4 C35 C34 108.5(7) . . ? 
N4 C35 H35A 110.0 . . ? 
C34 C35 H35A 110.0 . . ? 
N4 C35 H35B 110.0 . . ? 
C34 C35 H35B 110.0 . . ? 
H35A C35 H35B 108.4 . . ? 
C32 C36 H36A 109.5 . . ? 
C32 C36 H36B 109.5 . . ? 
H36A C36 H36B 109.5 . . ? 
C32 C36 H36C 109.5 . . ? 
H36A C36 H36C 109.5 . . ? 
H36B C36 H36C 109.5 . . ? 
O2 C37 N5 123.4(6) . . ? 
O2 C37 C38 119.9(5) . . ? 
N5 C37 C38 116.7(5) . . ? 
O3 C38 N6 126.3(7) . . ? 
O3 C38 C37 123.0(5) . . ? 
N6 C38 C37 110.6(6) . . ? 
C7 N1 C8 112.9(5) . . ? 
C7 N1 H1A 109.0 . . ? 
C8 N1 H1A 109.0 . . ? 
C7 N1 H1B 109.0 . . ? 
C8 N1 H1B 109.0 . . ? 
H1A N1 H1B 107.8 . . ? 
N3 N2 C23 107.8(7) . . ? 
N2 N3 C28 111.2(7) . . ? 
N2 N3 C29 120.0(6) . . ? 
C28 N3 C29 128.7(7) . . ? 
C32 N4 C31 112.9(6) . . ? 
C32 N4 C35 107.7(6) . . ? 
C31 N4 C35 110.1(7) . . ? 
C37 N5 C26 126.8(6) . . ? 
C37 N5 C25 117.4(6) . . ? 
C26 N5 C25 114.1(6) . . ? 
C38 N6 H6A 120.0 . . ? 
C38 N6 H6B 120.0 . . ? 
H6A N6 H6B 120.0 . . ? 
C33 O1 C34 109.4(5) . . ? 
O5 C39 O4 126.7(7) . . ? 
O5 C39 C40 120.8(7) . . ? 
O4 C39 C40 112.4(7) . . ? 
O6 C40 O7 123.8(6) . . ? 
O6 C40 C39 125.9(7) . . ? 
O7 C40 C39 110.3(7) . . ? 
O7 C41 C42 105.5(6) . . ? 
O7 C41 H41A 110.6 . . ? 
C42 C41 H41A 110.6 . . ? 
O7 C41 H41B 110.6 . . ? 
C42 C41 H41B 110.6 . . ? 
H41A C41 H41B 108.8 . . ? 
C41 C42 H42A 109.5 . . ? 
C41 C42 H42B 109.5 . . ? 
H42A C42 H42B 109.5 . . ? 
C41 C42 H42C 109.5 . . ? 
H42A C42 H42C 109.5 . . ? 
H42B C42 H42C 109.5 . . ? 
C40 O7 C41 115.3(6) . . ? 
C6B C1B C2B 120.6(9) . . ? 
C6B C1B Cl2 120.8(8) . . ? 
C2B C1B Cl2 118.5(8) . . ? 
C1B C2B C3B 119.8(9) . . ? 
C1B C2B H2B 120.1 . . ? 
C3B C2B H2B 120.1 . . ? 
C2B C3B C4B 119.4(8) . . ? 
C2B C3B H3B 120.3 . . ? 
C4B C3B H3B 120.3 . . ? 
C5B C4B C3B 117.6(8) . . ? 
C5B C4B C7B 122.5(8) . . ? 
C3B C4B C7B 120.0(7) . . ? 
C4B C5B C6B 122.4(9) . . ? 
C4B C5B H5B 118.8 . . ? 
C6B C5B H5B 118.8 . . ? 
C1B C6B C5B 120.2(9) . . ? 
C1B C6B H6B1 119.9 . . ? 
C5B C6B H6B1 119.9 . . ? 
N1B C7B C4B 110.5(6) . . ? 
N1B C7B H7B1 109.6 . . ? 
C4B C7B H7B1 109.6 . . ? 
N1B C7B H7B2 109.6 . . ? 
C4B C7B H7B2 109.6 . . ? 
H7B1 C7B H7B2 108.1 . . ? 
C9B C8B N1B 112.6(6) . . ? 
C9B C8B H8B1 109.1 . . ? 
N1B C8B H8B1 109.1 . . ? 
C9B C8B H8B2 109.1 . . ? 
N1B C8B H8B2 109.1 . . ? 
H8B1 C8B H8B2 107.8 . . ? 
C14B C9B C10B 118.5(8) . . ? 
C14B C9B C8B 121.9(7) . . ? 
C10B C9B C8B 119.6(7) . . ? 
C11B C10B C9B 119.0(8) . . ? 
C11B C10B H10B 120.5 . . ? 
C9B C10B H10B 120.5 . . ? 
C10B C11B C12B 123.0(9) . . ? 
C10B C11B H11B 118.5 . . ? 
C12B C11B H11B 118.5 . . ? 
C13B C12B C11B 117.1(8) . . ? 
C13B C12B C15B 121.2(8) . . ? 
C11B C12B C15B 121.3(8) . . ? 
C14B C13B C12B 121.4(8) . . ? 
C14B C13B H13B 119.3 . . ? 
C12B C13B H13B 119.3 . . ? 
C13B C14B C9B 120.8(8) . . ? 
C13B C14B H14B 119.6 . . ? 
C9B C14B H14B 119.6 . . ? 
C16B C15B C12B 174.0(9) . . ? 
C15B C16B C17B 173.8(10) . . ? 
C22B C17B C18B 116.3(8) . . ? 
C22B C17B C16B 121.3(8) . . ? 
C18B C17B C16B 122.4(9) . . ? 
C19B C18B C17B 123.2(9) . . ? 
C19B C18B Cl1 118.4(7) . . ? 
C17B C18B Cl1 118.3(7) . . ? 
C18B C19B C20B 117.3(9) . . ? 
C18B C19B H19B 121.3 . . ? 
C20B C19B H19B 121.3 . . ? 
C21B C20B C19B 122.8(8) . . ? 
C21B C20B H20B 118.6 . . ? 
C19B C20B H20B 118.6 . . ? 
C20B C21B C22B 116.3(8) . . ? 
C20B C21B C23B 123.6(8) . . ? 
C22B C21B C23B 120.0(8) . . ? 
C17B C22B C21B 123.9(8) . . ? 
C17B C22B H22B 118.0 . . ? 
C21B C22B H22B 118.0 . . ? 
N2B C23B C24B 111.9(7) . . ? 
N2B C23B C21B 117.4(7) . . ? 
C24B C23B C21B 130.7(8) . . ? 
C28B C24B C23B 105.1(7) . . ? 
C28B C24B C25B 122.5(7) . . ? 
C23B C24B C25B 132.2(7) . . ? 
N5B C25B C24B 109.5(7) . . ? 
N5B C25B H25C 109.8 . . ? 
C24B C25B H25C 109.8 . . ? 
N5B C25B H25D 109.8 . . ? 
C24B C25B H25D 109.8 . . ? 
H25C C25B H25D 108.2 . . ? 
N5B C26B C27B 109.6(7) . . ? 
N5B C26B H26C 109.7 . . ? 
C27B C26B H26C 109.7 . . ? 
N5B C26B H26D 109.7 . . ? 
C27B C26B H26D 109.7 . . ? 
H26C C26B H26D 108.2 . . ? 
C26B C27B C28B 106.6(7) . . ? 
C26B C27B H27C 110.4 . . ? 
C28B C27B H27C 110.4 . . ? 
C26B C27B H27D 110.4 . . ? 
C28B C27B H27D 110.4 . . ? 
H27C C27B H27D 108.6 . . ? 
N3B C28B C24B 108.3(7) . . ? 
N3B C28B C27B 126.8(7) . . ? 
C24B C28B C27B 124.9(7) . . ? 
N3B C29B C30B 114.2(7) . . ? 
N3B C29B H29C 108.7 . . ? 
C30B C29B H29C 108.7 . . ? 
N3B C29B H29D 108.7 . . ? 
C30B C29B H29D 108.7 . . ? 
H29C C29B H29D 107.6 . . ? 
C31C C30B C29B 113.5(9) . . ? 
C31C C30B C31B 44.8(9) . . ? 
C29B C30B C31B 115.7(5) . . ? 
C31C C30B H30C 137.3 . . ? 
C29B C30B H30C 108.4 . . ? 
C31B C30B H30C 108.4 . . ? 
C31C C30B H30D 67.0 . . ? 
C29B C30B H30D 108.4 . . ? 
C31B C30B H30D 108.4 . . ? 
H30C C30B H30D 107.4 . . ? 
O2B C37B N5B 122.4(5) . . ? 
O2B C37B C38B 117.6(3) . . ? 
N5B C37B C38B 120.0(3) . . ? 
O3B C38B N6B 124.8(5) . . ? 
O3B C38B C37B 121.0(3) . . ? 
N6B C38B C37B 114.2(3) . . ? 
C8B N1B C7B 112.2(5) . . ? 
C8B N1B H1B1 109.1 . . ? 
C7B N1B H1B1 109.5 . . ? 
C8B N1B H1B2 109.0 . . ? 
C7B N1B H1B2 109.1 . . ? 
H1B1 N1B H1B2 107.9 . . ? 
C23B N2B N3B 102.9(6) . . ? 
C28B N3B N2B 111.7(7) . . ? 
C28B N3B C29B 131.6(7) . . ? 
N2B N3B C29B 116.7(7) . . ? 
C37B N5B C25B 118.0(6) . . ? 
C37B N5B C26B 124.5(6) . . ? 
C25B N5B C26B 116.4(6) . . ? 
C38B N6B H6B2 120.0 . . ? 
C38B N6B H6B3 120.0 . . ? 
H6B2 N6B H6B3 120.0 . . ? 
N4B C31B C30B 111.3(10) . . ? 
N4B C31B H31C 109.4 . . ? 
C30B C31B H31C 109.4 . . ? 
N4B C31B H31D 109.4 . . ? 
C30B C31B H31D 109.4 . . ? 
H31C C31B H31D 108.0 . . ? 
C35B N4B C32B 112.6(11) . . ? 
C35B N4B C31B 110.3(10) . . ? 
C32B N4B C31B 109.5(16) . . ? 
C33B C32B C36B 118(3) . . ? 
C33B C32B N4B 97(3) . . ? 
C36B C32B N4B 111.1(13) . . ? 
C33B C32B H32A 110.1 . . ? 
C36B C32B H32A 110.1 . . ? 
N4B C32B H32A 110.1 . . ? 
C32B C33B O1B 122(4) . . ? 
C32B C33B H33C 106.8 . . ? 
O1B C33B H33C 106.8 . . ? 
C32B C33B H33D 106.8 . . ? 
O1B C33B H33D 106.8 . . ? 
H33C C33B H33D 106.6 . . ? 
C33B O1B C34B 101(4) . . ? 
O1B C34B C35B 111.3(12) . . ? 
O1B C34B H34C 109.4 . . ? 
C35B C34B H34C 109.4 . . ? 
O1B C34B H34D 109.4 . . ? 
C35B C34B H34D 109.4 . . ? 
H34C C34B H34D 108.0 . . ? 
N4B C35B C34B 110.3(12) . . ? 
N4B C35B H35C 109.6 . . ? 
C34B C35B H35C 109.6 . . ? 
N4B C35B H35D 109.6 . . ? 
C34B C35B H35D 109.6 . . ? 
H35C C35B H35D 108.1 . . ? 
C32B C36B H36D 109.5 . . ? 
C32B C36B H36E 109.5 . . ? 
H36D C36B H36E 109.5 . . ? 
C32B C36B H36F 109.5 . . ? 
H36D C36B H36F 109.5 . . ? 
H36E C36B H36F 109.5 . . ? 
C30B C31C N4C 116.2(14) . . ? 
C30B C31C H31E 108.2 . . ? 
N4C C31C H31E 108.2 . . ? 
C30B C31C H31F 108.2 . . ? 
N4C C31C H31F 108.2 . . ? 
H31E C31C H31F 107.4 . . ? 
C35C N4C C31C 122.0(19) . . ? 
C35C N4C C32C 110.7(15) . . ? 
C31C N4C C32C 108.5(17) . . ? 
C36C C32C N4C 115.4(15) . . ? 
C36C C32C C33C 106(3) . . ? 
N4C C32C C33C 105(3) . . ? 
C36C C32C H32B 110.0 . . ? 
N4C C32C H32B 110.0 . . ? 
C33C C32C H32B 110.0 . . ? 
O1C C33C C32C 111(7) . . ? 
O1C C33C H33E 109.3 . . ? 
C32C C33C H33E 109.3 . . ? 
O1C C33C H33F 109.4 . . ? 
C32C C33C H33F 109.4 . . ? 
H33E C33C H33F 108.0 . . ? 
C33C O1C C34C 121(5) . . ? 
O1C C34C C35C 105(2) . . ? 
O1C C34C H34E 110.7 . . ? 
C35C C34C H34E 110.7 . . ? 
O1C C34C H34F 110.7 . . ? 
C35C C34C H34F 110.7 . . ? 
H34E C34C H34F 108.8 . . ? 
N4C C35C C34C 118.5(18) . . ? 
N4C C35C H35E 107.7 . . ? 
C34C C35C H35E 107.7 . . ? 
N4C C35C H35F 107.7 . . ? 
C34C C35C H35F 107.7 . . ? 
H35E C35C H35F 107.1 . . ? 
C32C C36C H36G 109.5 . . ? 
C32C C36C H36H 109.5 . . ? 
H36G C36C H36H 109.5 . . ? 
C32C C36C H36I 109.5 . . ? 
H36G C36C H36I 109.5 . . ? 
H36H C36C H36I 109.5 . . ? 
O5B C39B O4B 128.5(7) . . ? 
O5B C39B C40B 116.9(7) . . ? 
O4B C39B C40B 114.6(7) . . ? 
O6B C40B O7B 124.2(7) . . ? 
O6B C40B C39B 122.0(7) . . ? 
O7B C40B C39B 113.9(7) . . ? 
O7B C41B C42B 108.8(6) . . ? 
O7B C41B H41C 109.9 . . ? 
C42B C41B H41C 109.9 . . ? 
O7B C41B H41D 109.9 . . ? 
C42B C41B H41D 109.9 . . ? 
H41C C41B H41D 108.3 . . ? 
C41B C42B H42D 109.5 . . ? 
C41B C42B H42E 109.5 . . ? 
H42D C42B H42E 109.5 . . ? 
C41B C42B H42F 109.5 . . ? 
H42D C42B H42F 109.5 . . ? 
H42E C42B H42F 109.5 . . ? 
C40B O7B C41B 116.6(6) . . ? 
 
loop_ 
 _geom_torsion_atom_site_label_1 
 _geom_torsion_atom_site_label_2 
 _geom_torsion_atom_site_label_3 
 _geom_torsion_atom_site_label_4 
 _geom_torsion 
 _geom_torsion_site_symmetry_1 
 _geom_torsion_site_symmetry_2 
 _geom_torsion_site_symmetry_3 
 _geom_torsion_site_symmetry_4 
 _geom_torsion_publ_flag 
C6 C1 C2 C3 3.9(13) . . . . ? 
Cl2B C1 C2 C3 -177.9(6) . . . . ? 
C1 C2 C3 C4 -4.3(12) . . . . ? 
C2 C3 C4 C5 0.6(12) . . . . ? 
C2 C3 C4 C7 -178.9(7) . . . . ? 
C3 C4 C5 C6 3.6(14) . . . . ? 
C7 C4 C5 C6 -176.9(9) . . . . ? 
C4 C5 C6 C1 -4.0(14) . . . . ? 
C2 C1 C6 C5 0.2(14) . . . . ? 
Cl2B C1 C6 C5 -178.1(7) . . . . ? 
C5 C4 C7 N1 72.6(10) . . . . ? 
C3 C4 C7 N1 -107.9(9) . . . . ? 
N1 C8 C9 C14 -69.5(10) . . . . ? 
N1 C8 C9 C10 109.8(8) . . . . ? 
C14 C9 C10 C11 0.2(13) . . . . ? 
C8 C9 C10 C11 -179.1(8) . . . . ? 
C9 C10 C11 C12 1.1(13) . . . . ? 
C10 C11 C12 C13 -3.5(13) . . . . ? 
C10 C11 C12 C15 -178.6(8) . . . . ? 
C11 C12 C13 C14 4.4(13) . . . . ? 
C15 C12 C13 C14 179.3(8) . . . . ? 
C10 C9 C14 C13 0.9(14) . . . . ? 
C8 C9 C14 C13 -179.8(8) . . . . ? 
C12 C13 C14 C9 -3.2(13) . . . . ? 
C13 C12 C15 C16 70(20) . . . . ? 
C11 C12 C15 C16 -115(19) . . . . ? 
C12 C15 C16 C17 -85(40) . . . . ? 
C15 C16 C17 C18 -157(34) . . . . ? 
C15 C16 C17 C22 23(34) . . . . ? 
C22 C17 C18 C19 2.0(12) . . . . ? 
C16 C17 C18 C19 -178.0(8) . . . . ? 
C22 C17 C18 Cl1B -177.6(6) . . . . ? 
C16 C17 C18 Cl1B 2.4(12) . . . . ? 
C17 C18 C19 C20 -1.7(13) . . . . ? 
Cl1B C18 C19 C20 177.9(7) . . . . ? 
C18 C19 C20 C21 1.5(13) . . . . ? 
C19 C20 C21 C22 -1.6(12) . . . . ? 
C19 C20 C21 C23 177.8(8) . . . . ? 
C20 C21 C22 C17 2.1(12) . . . . ? 
C23 C21 C22 C17 -177.4(8) . . . . ? 
C18 C17 C22 C21 -2.2(12) . . . . ? 
C16 C17 C22 C21 177.8(8) . . . . ? 
C22 C21 C23 N2 24.3(13) . . . . ? 
C20 C21 C23 N2 -155.2(8) . . . . ? 
C22 C21 C23 C24 -156.2(9) . . . . ? 
C20 C21 C23 C24 24.3(15) . . . . ? 
N2 C23 C24 C28 -0.1(10) . . . . ? 
C21 C23 C24 C28 -179.7(9) . . . . ? 
N2 C23 C24 C25 -175.8(9) . . . . ? 
C21 C23 C24 C25 4.7(17) . . . . ? 
C28 C24 C25 N5 -4.9(12) . . . . ? 
C23 C24 C25 N5 170.1(9) . . . . ? 
N5 C26 C27 C28 48.0(9) . . . . ? 
C23 C24 C28 N3 0.0(10) . . . . ? 
C25 C24 C28 N3 176.1(8) . . . . ? 
C23 C24 C28 C27 174.9(8) . . . . ? 
C25 C24 C28 C27 -8.9(14) . . . . ? 
C26 C27 C28 N3 161.3(8) . . . . ? 
C26 C27 C28 C24 -12.6(12) . . . . ? 
N3 C29 C30 C31 74.9(8) . . . . ? 
C29 C30 C31 N4 52.4(8) . . . . ? 
N4 C32 C33 O1 61.8(7) . . . . ? 
C36 C32 C33 O1 -177.3(6) . . . . ? 
O1 C34 C35 N4 -58.1(9) . . . . ? 
O2 C37 C38 O3 143.6(7) . . . . ? 
N5 C37 C38 O3 -36.7(8) . . . . ? 
O2 C37 C38 N6 -32.4(7) . . . . ? 
N5 C37 C38 N6 147.3(6) . . . . ? 
C4 C7 N1 C8 177.4(6) . . . . ? 
C9 C8 N1 C7 -167.5(7) . . . . ? 
C24 C23 N2 N3 0.2(10) . . . . ? 
C21 C23 N2 N3 179.8(8) . . . . ? 
C23 N2 N3 C28 -0.2(10) . . . . ? 
C23 N2 N3 C29 -177.8(8) . . . . ? 
C24 C28 N3 N2 0.1(10) . . . . ? 
C27 C28 N3 N2 -174.7(8) . . . . ? 
C24 C28 N3 C29 177.5(8) . . . . ? 
C27 C28 N3 C29 2.7(14) . . . . ? 
C30 C29 N3 N2 -70.4(10) . . . . ? 
C30 C29 N3 C28 112.4(9) . . . . ? 
C33 C32 N4 C31 176.4(6) . . . . ? 
C36 C32 N4 C31 59.2(8) . . . . ? 
C33 C32 N4 C35 -61.8(8) . . . . ? 
C36 C32 N4 C35 -178.9(7) . . . . ? 
C30 C31 N4 C32 -175.7(6) . . . . ? 
C30 C31 N4 C35 63.8(8) . . . . ? 
C34 C35 N4 C32 60.5(9) . . . . ? 
C34 C35 N4 C31 -176.0(7) . . . . ? 
O2 C37 N5 C26 162.5(7) . . . . ? 
C38 C37 N5 C26 -17.1(9) . . . . ? 
O2 C37 N5 C25 -1.6(11) . . . . ? 
C38 C37 N5 C25 178.8(6) . . . . ? 
C27 C26 N5 C37 128.1(8) . . . . ? 
C27 C26 N5 C25 -67.3(9) . . . . ? 
C24 C25 N5 C37 -152.3(7) . . . . ? 
C24 C25 N5 C26 41.6(10) . . . . ? 
C32 C33 O1 C34 -57.1(8) . . . . ? 
C35 C34 O1 C33 56.3(9) . . . . ? 
O5 C39 C40 O6 174.5(8) . . . . ? 
O4 C39 C40 O6 -2.0(11) . . . . ? 
O5 C39 C40 O7 -3.8(10) . . . . ? 
O4 C39 C40 O7 179.7(6) . . . . ? 
O6 C40 O7 C41 -8.3(11) . . . . ? 
C39 C40 O7 C41 170.0(6) . . . . ? 
C42 C41 O7 C40 -177.8(7) . . . . ? 
C6B C1B C2B C3B -0.6(13) . . . . ? 
Cl2 C1B C2B C3B -178.1(7) . . . . ? 
C1B C2B C3B C4B 0.1(12) . . . . ? 
C2B C3B C4B C5B 0.0(12) . . . . ? 
C2B C3B C4B C7B -178.9(7) . . . . ? 
C3B C4B C5B C6B 0.4(12) . . . . ? 
C7B C4B C5B C6B 179.3(7) . . . . ? 
C2B C1B C6B C5B 1.0(14) . . . . ? 
Cl2 C1B C6B C5B 178.5(7) . . . . ? 
C4B C5B C6B C1B -1.0(14) . . . . ? 
C5B C4B C7B N1B 110.8(8) . . . . ? 
C3B C4B C7B N1B -70.3(8) . . . . ? 
N1B C8B C9B C14B -108.2(8) . . . . ? 
N1B C8B C9B C10B 69.5(9) . . . . ? 
C14B C9B C10B C11B 0.6(12) . . . . ? 
C8B C9B C10B C11B -177.2(8) . . . . ? 
C9B C10B C11B C12B -3.3(13) . . . . ? 
C10B C11B C12B C13B 4.9(13) . . . . ? 
C10B C11B C12B C15B 178.1(8) . . . . ? 
C11B C12B C13B C14B -4.0(12) . . . . ? 
C15B C12B C13B C14B -177.2(8) . . . . ? 
C12B C13B C14B C9B 1.5(12) . . . . ? 
C10B C9B C14B C13B 0.3(11) . . . . ? 
C8B C9B C14B C13B 178.0(7) . . . . ? 
C13B C12B C15B C16B -18(9) . . . . ? 
C11B C12B C15B C16B 169(9) . . . . ? 
C12B C15B C16B C17B -177(6) . . . . ? 
C15B C16B C17B C22B 6(10) . . . . ? 
C15B C16B C17B C18B -175(9) . . . . ? 
C22B C17B C18B C19B -0.6(13) . . . . ? 
C16B C17B C18B C19B 180.0(9) . . . . ? 
C22B C17B C18B Cl1 179.9(7) . . . . ? 
C16B C17B C18B Cl1 0.5(12) . . . . ? 
C17B C18B C19B C20B 1.0(14) . . . . ? 
Cl1 C18B C19B C20B -179.4(7) . . . . ? 
C18B C19B C20B C21B 0.1(14) . . . . ? 
C19B C20B C21B C22B -1.6(13) . . . . ? 
C19B C20B C21B C23B -178.7(8) . . . . ? 
C18B C17B C22B C21B -1.0(13) . . . . ? 
C16B C17B C22B C21B 178.4(8) . . . . ? 
C20B C21B C22B C17B 2.1(13) . . . . ? 
C23B C21B C22B C17B 179.3(8) . . . . ? 
C20B C21B C23B N2B 155.8(8) . . . . ? 
C22B C21B C23B N2B -21.2(12) . . . . ? 
C20B C21B C23B C24B -24.1(14) . . . . ? 
C22B C21B C23B C24B 158.9(9) . . . . ? 
N2B C23B C24B C28B -0.5(10) . . . . ? 
C21B C23B C24B C28B 179.5(8) . . . . ? 
N2B C23B C24B C25B 173.5(9) . . . . ? 
C21B C23B C24B C25B -6.6(16) . . . . ? 
C28B C24B C25B N5B 2.4(12) . . . . ? 
C23B C24B C25B N5B -170.7(9) . . . . ? 
N5B C26B C27B C28B -51.1(9) . . . . ? 
C23B C24B C28B N3B 1.4(10) . . . . ? 
C25B C24B C28B N3B -173.3(7) . . . . ? 
C23B C24B C28B C27B -179.5(8) . . . . ? 
C25B C24B C28B C27B 5.9(14) . . . . ? 
C26B C27B C28B N3B -161.7(8) . . . . ? 
C26B C27B C28B C24B 19.3(12) . . . . ? 
N3B C29B C30B C31C -78.0(11) . . . . ? 
N3B C29B C30B C31B -127.6(7) . . . . ? 
O2B C37B C38B O3B -138.2(6) . . . . ? 
N5B C37B C38B O3B 39.3(5) . . . . ? 
O2B C37B C38B N6B 43.0(5) . . . . ? 
N5B C37B C38B N6B -139.5(5) . . . . ? 
C9B C8B N1B C7B 167.8(6) . . . . ? 
C4B C7B N1B C8B -175.3(6) . . . . ? 
C24B C23B N2B N3B -0.6(9) . . . . ? 
C21B C23B N2B N3B 179.5(7) . . . . ? 
C24B C28B N3B N2B -1.8(10) . . . . ? 
C27B C28B N3B N2B 179.0(8) . . . . ? 
C24B C28B N3B C29B 179.4(9) . . . . ? 
C27B C28B N3B C29B 0.2(15) . . . . ? 
C23B N2B N3B C28B 1.5(9) . . . . ? 
C23B N2B N3B C29B -179.6(7) . . . . ? 
C30B C29B N3B C28B -115.4(9) . . . . ? 
C30B C29B N3B N2B 65.9(9) . . . . ? 
O2B C37B N5B C25B 3.2(9) . . . . ? 
C38B C37B N5B C25B -174.2(5) . . . . ? 
O2B C37B N5B C26B -164.6(7) . . . . ? 
C38B C37B N5B C26B 18.1(8) . . . . ? 
C24B C25B N5B C37B 153.1(6) . . . . ? 
C24B C25B N5B C26B -38.2(9) . . . . ? 
C27B C26B N5B C37B -125.9(7) . . . . ? 
C27B C26B N5B C25B 66.2(9) . . . . ? 
C31C C30B C31B N4B -39.3(12) . . . . ? 
C29B C30B C31B N4B 59.1(9) . . . . ? 
C30B C31B N4B C35B 75.0(14) . . . . ? 
C30B C31B N4B C32B -160.5(8) . . . . ? 
C35B N4B C32B C33B -59(3) . . . . ? 
C31B N4B C32B C33B 178(3) . . . . ? 
C35B N4B C32B C36B 178.1(17) . . . . ? 
C31B N4B C32B C36B 55.0(17) . . . . ? 
C36B C32B C33B O1B -171(5) . . . . ? 
N4B C32B C33B O1B 70(7) . . . . ? 
C32B C33B O1B C34B -69(7) . . . . ? 
C33B O1B C34B C35B 53(3) . . . . ? 
C32B N4B C35B C34B 59.5(17) . . . . ? 
C31B N4B C35B C34B -177.8(12) . . . . ? 
O1B C34B C35B N4B -55.6(17) . . . . ? 
C29B C30B C31C N4C -56.2(19) . . . . ? 
C31B C30B C31C N4C 47.2(15) . . . . ? 
C30B C31C N4C C35C -75(2) . . . . ? 
C30B C31C N4C C32C 154.3(14) . . . . ? 
C35C N4C C32C C36C -72.9(19) . . . . ? 
C31C N4C C32C C36C 63(2) . . . . ? 
C35C N4C C32C C33C 43(4) . . . . ? 
C31C N4C C32C C33C 180(4) . . . . ? 
C36C C32C C33C O1C 81(7) . . . . ? 
N4C C32C C33C O1C -42(7) . . . . ? 
C32C C33C O1C C34C 56(7) . . . . ? 
C33C O1C C34C C35C -60(5) . . . . ? 
C31C N4C C35C C34C 173.4(18) . . . . ? 
C32C N4C C35C C34C -57(2) . . . . ? 
O1C C34C C35C N4C 61(3) . . . . ? 
O5B C39B C40B O6B -177.5(8) . . . . ? 
O4B C39B C40B O6B 3.4(11) . . . . ? 
O5B C39B C40B O7B 1.5(10) . . . . ? 
O4B C39B C40B O7B -177.7(7) . . . . ? 
O6B C40B O7B C41B 11.6(12) . . . . ? 
C39B C40B O7B C41B -167.3(7) . . . . ? 
C42B C41B O7B C40B 175.3(8) . . . . ? 
 
loop_ 
 _geom_hbond_atom_site_label_D 
 _geom_hbond_atom_site_label_H 
 _geom_hbond_atom_site_label_A 
 _geom_hbond_distance_DH 
 _geom_hbond_distance_HA 
 _geom_hbond_distance_DA 
 _geom_hbond_angle_DHA 
 _geom_hbond_site_symmetry_A 
N1 H1A O4  0.92 1.85 2.774(7) 179.0 1_565 
N1 H1A O5  0.92 2.64 3.223(7) 121.7 1_565 
N1 H1B O4B  0.92 2.06 2.846(7) 143.0 . 
N1 H1B O6B  0.92 2.29 3.053(7) 139.8 . 
N6 H6A O5  0.88 2.16 2.984(9) 156.5 2_554 
N6 H6A O7  0.88 2.45 3.078(8) 128.7 2_554 
N6 H6B O7B  0.88 2.45 3.148(8) 136.2 1_656 
N1B H1B1 O4  0.92 2.02 2.805(6) 142.3 . 
N1B H1B1 O6  0.92 2.29 3.044(7) 139.3 . 
N1B H1B2 O4B  0.92 1.85 2.766(6) 177.6 1_645 
N1B H1B2 O5B  0.92 2.63 3.214(7) 122.3 1_645 
N6B H6B2 O5B  0.88 2.15 3.006(8) 164.6 2_544 
N6B H6B2 O7B  0.88 2.48 3.076(8) 125.8 2_544 
N6B H6B3 O7  0.88 2.53 3.251(8) 139.3 1_656 
 
_diffrn_measured_fraction_theta_max    0.993 
_diffrn_reflns_theta_full              23.71 
_diffrn_measured_fraction_theta_full   0.993 
_refine_diff_density_max    0.406 
_refine_diff_density_min   -0.309 
_refine_diff_density_rms    0.050 
